# Supplementary material for: Racialized bias in pediatric pain: the role of observers’ attentional processing and estimations of children’s pain
Source: PeerJ journal article supplement (doi:10.7717/peerj.19969), 2025-08-29
Supplement: Appendix_S1.docx [file Appendix_S1.docx]

| **Occupation** | **Frequency** | **Percent** |
| --- | --- | --- |
| Administrative Support - Supervisors | 2 | 2,5 |
| Administrative Support - Financial Clerks | 1 | 1,3 |
| Administrative Support - Information and Records | 2 | 2,5 |
| Administrative Support - Recording, Scheduling, Dispatching, Distributing | 1 | 1,3 |
| Administrative Support - Secretaries and Assistants | 4 | 5 |
| Administrative Support - Other Support (data entry, office clerk, proofreaders) | 2 | 2,5 |
| Arts/Design/Entertainment/Sports - Art and Design | 1 | 1,3 |
| Arts/Design/Entertainment/Sports - Media and communication | 4 | 5 |
| Business - Business Operations | 2 | 2,5 |
| Business - Financial Specialists | 1 | 1,3 |
| Computer/Math - Computer Specialists | 4 | 5 |
| Construction/Extraction - Supervisors | 1 | 1,3 |
| Construction/Extraction - Other | 1 | 1,3 |
| Education - Postsecondary Teachers | 2 | 2,5 |
| Education - Primary, Secondary, and Special Ed Teachers | 6 | 7,5 |
| Education - Other education, training, and library occupations | 2 | 2,5 |
| Engineers/Architects - Engineers | 3 | 3,8 |
| Food Service - Supervisors | 1 | 1,3 |
| Healthcare - Technologists and Technicians | 1 | 1,3 |
| Healthcare - Nursing and Home Health Assistants | 1 | 1,3 |
| Homemaker or Parenting | 9 | 11,3 |
| Management - Operations Specialists | 2 | 2,5 |
| Management - Other Management Occupations | 3 | 3,8 |
| Production - Supervisors | 2 | 2,5 |
| Retired | 4 | 5 |
| Sales - Supervisors | 1 | 1,3 |
| Sales - Retail | 4 | 5 |
| Sales - Sales Representatives and Services | 3 | 3,8 |
| Science - Life Scientists | 1 | 1,3 |
| Science - Physical scientists | 1 | 1,3 |
| Science - Life, Physical, Social Science Technicians | 1 | 1,3 |
| Transportation - Motor Vehicle Operators | 1 | 1,3 |
| Unemployed | 6 | 7,5 |
| Total | 80 | 100 |

The occupation categories that were provided were:

Administrative Support - Supervisors, Administrative Support - Financial Clerks, Administrative Support - Information and Records, Administrative Support - Recording, Scheduling, Dispatching, Distributing, Administrative Support - Secretaries and Assistants, Administrative Support - Other Support (data entry, office clerk, proofreaders), Arts/Design/Entertainment/Sports - Art and Design, Arts/Design/Entertainment/Sports - Entertainers and Performers, Arts/Design/Entertainment/Sports - Media and communication, Arts/Design/Entertainment/Sports - Media Equipment workers, Business - Business Operations, Business - Financial Specialists, Computer/Math - Computer Specialists, Computer/Math - Math Scientists, Computer/Math - Math Technicians, Construction/Extraction - Supervisors, Construction/Extraction - Construction Trades, Construction/Extraction - Helpers, Construction Trades, Construction/Extraction - Extraction e.g., mining, oil, Construction/Extraction - Other, Education - Postsecondary Teachers, Education - Primary, Secondary, and Special Ed Teachers, Education - Other teachers and instructors, Education - Librarians, Curators, Archivists, Education - Other education, training, and library occupations, Education - Student, Engineers/Architects - Architects, Surveyors, Cartographers, Engineers/Architects - Engineers, Engineers/Architects - Drafters, Engineering and Mapping Technicians, Farming, Fishing, Forestry - Supervisors, Farming, Fishing, Forestry - Agriculture, Farming, Fishing, Forestry - Fishing and Hunting, Farming, Fishing, Forestry - Forest, Conservation, Logging, Farming, Fishing, Forestry - Other, Food Service - Supervisors, Food Service - Cooks and food prep, Food Service - Servers, Food Service - Other food service workers e.g., dishwasher, host, Healthcare - Diagnosing and Treating Practitioners MD, Dentist, etc., Healthcare - Technologists and Technicians, Healthcare - Nursing and Home Health Assistants, Healthcare - Occupational and Physical Therapist Assistants, Healthcare - Other healthcare support, Homemaker or Parenting, Legal - Lawyers, Judges, and related workers, Legal - Legal support workers, Maintenance - Building and Grounds Supervisors, Maintenance - Building workers, Maintenance - Grounds Maintenance, Management - Top Executives, Management - Advertising, Sales, PR, Marketing, Management - Operations Specialists, Management - Other Management Occupations, Military - Officer and Tactical Leaders/Managers, Military - First-line enlisted supervisor/manager, Military - enlisted tactical, air/weapons, crew, other, Production - Supervisors, Production - Assemblers and Fabricators, Production - Food processing, Production - Metal and Plastic, Production - Printers, Production - Textile, Apparel, Furnishings, Production - Woodworkers, Production - Plant and System Operators, Production - Other, Protective Service - Supervisors, Protective Services - Firefighting and prevention, Protective services - Law Enforcement, Protective Services - Other e.g., security, lifeguards, crossing guards, Repair/Installation - Supervisors, Repair/Installation - Electrical and Electronic, Repair/Installation - Vehicle and Mobile Equipment, Repair/Installation - Other, Retired, Sales - Supervisors, Sales - Retail, Sales - Sales Representatives and Services, Sales - Wholesale and Manufacturing, Sales - Other sales e.g., telemarketers, real estate, Science - Life Scientists, Science - Physical scientists, Science - Social Scientists, Science - Life, Physical, Social Science Technicians, Service and Personal Care - Supervisors, Service and Personal Care - Animal Care, Service and Personal Care - Entertainment attendants, Service and Personal Care - Funeral Service, Service and Personal Care - Personal Appearance, Service and Personal Care - Transportation, Tourism, Lodging, Service and Personal Care - Other service e.g., child care, fitness, Social Service - Counsellors, Social Workers, Community specialists, Social Service - Religious Workers, Transportation - Supervisors, Transportation - Air Transportation, Transportation - Motor Vehicle Operators, Transportation - Rail Transport, Transportation - Water Transport, Transportation - Material Moving, Transportation - Other, Unemployed
