# Supplementary material for: Racialized bias in pediatric pain: the role of observers’ attentional processing and estimations of children’s pain
Source: PeerJ journal article supplement (doi:10.7717/peerj.19969), 2025-08-29
Supplement: Appendix_S3.docx [file Appendix_S3.docx]

| **Study Outcome** |  |  |  |  |
| --- | --- | --- | --- | --- |
|  |  | **Racial Group** | **Pain Expressiveness** | **Mean (Standard Deviation)** |
| *Pain Ratings*  *(on a scale from 0 [no pain] –*  *10 [a lot of pain])* |  |  |  |  |
|  |  | Black |  |  |
|  |  |  | Neutral | 1.32 (1.39) |
|  |  |  | Moderate | 4.83 (1.74) |
|  |  |  | High | 7.36 (7.67) |
|  |  | White |  |  |
|  |  |  | Neutral | 1.36 (1.39) |
|  |  |  | Moderate | 4.81 (1.79) |
|  |  |  | High | 7.53 (1.71) |
