# Supplementary material for: Racialized bias in pediatric pain: the role of observers’ attentional processing and estimations of children’s pain
Source: PeerJ journal article supplement (doi:10.7717/peerj.19969), 2025-08-29
Supplement: Appendix_S4.docx [file Appendix_S4.docx]

Supplementary table 1: Contrast Weights for the Four Main Hypotheses

| **Trial Condition** | **Race** | **Engagement  Contrast** | **Disengagement  Contrasts** | **Black vs White Engagement  Contrast** | **Black vs White Disengagement  Contrasts** |
| --- | --- | --- | --- | --- | --- |
| Congruent – High | Black | .50 | .00 | -.50 | .00 |
| Congruent – High | White | .50 | .00 | .50 | .00 |
| Congruent – Moderate | Black | .00 | .50 | -.50 | .00 |
| Congruent – Moderate | White | .00 | .50 | .50 | .00 |
| Neutral | Black | .50 | .00 | 1.00 | 1.00 |
| Neutral | White | .50 | .00 | -1.00 | -1.00 |
| Incongruent – Moderate | Black | .00 | .50 | .00 | -.50 |
| Incongruent – Moderate | White | .00 | .50 | .00 | .50 |
| Incongruent – High | Black | -1.00 | -1.00 | .00 | -.50 |
| Incongruent – High | White | -1.00 | -1.00 | .00 | .50 |
