# Supplementary material for: Racialized bias in pediatric pain: the role of observers’ attentional processing and estimations of children’s pain
Source: PeerJ journal article supplement (doi:10.7717/peerj.19969), 2025-08-29
Supplement: Appendix_S6.docx [file Appendix_S6.docx]

Supplementary table 3: Contrast Weights For the Exploratory Analyses Assessing the Impact of Pain Expressiveness

|  |  | **Engagement** | | | **Disengagement** | | |
| --- | --- | --- | --- | --- | --- | --- | --- |
| **Trial Condition** | **Race** | | **Moderate** | **High** | | **Moderate** | **High** |
| Congruent – High | Black | | .00 | -1.00 | | .00 | .00 |
| Congruent – High | White | | .00 | 1.00 | | .00 | .00 |
| Congruent – Moderate | Black | | -1.00 | .00 | | .00 | .00 |
| Congruent – Moderate | White | | 1.00 | .00 | | .00 | .00 |
| Neutral | Black | | 1.00 | 1.00 | | 1.00 | 1.00 |
| Neutral | White | | -1.00 | -1.00 | | -1.00 | -1.00 |
| Incongruent – Moderate | Black | | .00 | .00 | | -1.00 | .00 |
| Incongruent – Moderate | White | | .00 | .00 | | 1.00 | .00 |
| Incongruent – High | Black | | .00 | .00 | | .00 | -1.00 |
| Incongruent – High | White | | .00 | .00 | | .00 | 1.00 |
