# Supplementary material for: Racialized bias in pediatric pain: the role of observers’ attentional processing and estimations of children’s pain
Source: PeerJ journal article supplement (doi:10.7717/peerj.19969), 2025-08-29
Supplement: Appendix_S7.docx [file Appendix_S7.docx]

Supplementary table 4: Contrast Tests for the Four Main Hypotheses

| **Contrast** | **Estimate** | **SE** | ***z*** | ***p*** | **CI low** | **CI up** |
| --- | --- | --- | --- | --- | --- | --- |
| Engagement | -.02 | .02 | -1.00. | .318 | -.07 | .03 |
| Disengagement | .02 | .01 | 1.82 | .068 | -.01 | .05 |
| Black vs White  Engagement | .05 | .03 | 2.54 | .011 | -.00 | .09 |
| Black vs White  Disengagement | .00 | .01 | .12 | .907 | -.03 | .03 |
