# Supplementary material for: Racialized bias in pediatric pain: the role of observers’ attentional processing and estimations of children’s pain
Source: PeerJ journal article supplement (doi:10.7717/peerj.19969), 2025-08-29
Supplement: Appendix_S8.docx [file Appendix_S8.docx]

Supplementary table 5: Contrast Tests for Additional Contrasts Testing Engagement Only for White and Only for Black Pain Faces

| **Contrast** | **Estimate** | **SE** | ***z*** | ***p*** | **CI low** | **CI up** |
| --- | --- | --- | --- | --- | --- | --- |
| Engagement – White Faces | .01 | .01 | .96 | .338 | -.02 | .05 |
| Engagement – Black Faces | -.03 | .01 | -2.45 | .014 | -.07 | .00 |
