# Supplementary material for: Racialized bias in pediatric pain: the role of observers’ attentional processing and estimations of children’s pain
Source: PeerJ journal article supplement (doi:10.7717/peerj.19969), 2025-08-29
Supplement: Appendix_S9.docx [file Appendix_S9.docx]

Supplementary table 6: Fixed Effects Parameter Estimates of the LMM on the Log Reaction Times

| **Parameter** | **Estimate** | **SE** | **t** | **df** | ***p*** |
| --- | --- | --- | --- | --- | --- |
| (Intercept) | 7.21 | .03 | 254.36 | 115.70 | <.001 |
| White | .04 | .03 | 1.53 | 5975.30 | .126 |
| Incongruent – High | .03 | .02 | 1.37 | 1450.70 | .172 |
| Congruent – Moderate | -.01 | .03 | -.47 | 616.40 | .638 |
| Incongruent – Moderate | .05 | .02 | 2.47 | 474.20 | .014 |
| Neutral | .03 | .02 | 1.50 | 556.50 | .135 |
| Pain belief (z-scored) | .04 | .02 | 2.39 | 76.90 | .020 |
| Gender | -.10 | .03 | -2.85 | 76.50 | .006 |
| Age (z-scored) | .04 | .02 | 2.27 | 76.60 | .026 |
| White * Incongruent – High | -.04 | .03 | -1.41 | 21555.00 | .158 |
| White * Congruent – Moderate | -.02 | .03 | -.58 | 21600.80 | .564 |
| White * Incongruent – Moderate | -.07 | .03 | -2.78 | 21550.10 | .006 |
| White * Neutral | -.06 | .03 | -2.25 | 21548.20 | .024 |
