# Supplementary material for: Racialized bias in pediatric pain: the role of observers’ attentional processing and estimations of children’s pain
Source: PeerJ journal article supplement (doi:10.7717/peerj.19969), 2025-08-29
Supplement: Appendix_S10.docx [file Appendix_S10.docx]

Supplementary table 7: Random Effects Parameter Estimates of the LMM on the Log Reaction Times

| **Random Effect** |  | **Variance** | **Standard Deviation** |
| --- | --- | --- | --- |
| (Intercept) |  | .036 | .189 |
| Race |  | .003 | .056 |
| Incongruent – High |  | .001 | .036 |
| Congruent – Moderate |  | .003 | .051 |
| Incongruent – Moderate |  | .003 | .050 |
| Neutral |  | .002 | .049 |
|  |  |  |  |
| Residual |  | .133 | .365 |
|  |  |  |  |
| **Random Effect** |  | **Covariance** | **Correlation** |
| (Intercept) | Race | .001 | .094 |
| (Intercept) | Incongruent – High | -.007 | -.994 |
| (Intercept) | Congruent – Moderate | -.005 | -.569 |
| (Intercept) | Incongruent – Moderate | -.007 | -.762 |
| (Intercept) | Neutral | -.008 | -.836 |
| Race | Incongruent – High | .000 | .019 |
| Race | Congruent – Moderate | -.001 | -.209 |
| Race | Incongruent – Moderate | .000 | .067 |
| Race | Neutral | -.001 | -.216 |
| Incongruent – High | Congruent – Moderate | .001 | .547 |
| Incongruent – High | Incongruent – Moderate | .001 | .773 |
| Incongruent – High | Neutral | .001 | .815 |
| Congruent – Moderate | Incongruent – Moderate | .001 | .439 |
| Congruent – Moderate | Neutral | .001 | .601 |
| Incongruent – Moderate | Neutral | .002 | .947 |
