# Supplementary material for: Racialized bias in pediatric pain: the role of observers’ attentional processing and estimations of children’s pain
Source: PeerJ journal article supplement (doi:10.7717/peerj.19969), 2025-08-29
Supplement: Appendix_S11.docx [file Appendix_S11.docx]

Supplementary table 8: Contrast Tests For the Exploratory Analyses Assessing the Impact of Pain Expressiveness

| **Contrast** | **Estimate** | **SE** | ***z*** | ***p*** | **CI low** | **CI up** |
| --- | --- | --- | --- | --- | --- | --- |
| Engagement – high pain expressiveness | .06 | .03 | 2.25 | .024 | -.01 | .12 |
| Engagement – moderate pain expressiveness | .04 | .03 | 1.48 | .140 | -.03 | .10 |
| Disengagement – high pain expressiveness | .02 | .01 | 1.50 | .134 | -.01 | .05 |
| Disengagement – moderate pain expressiveness | -.02 | .01 | -1.31 | .190 | -.05 | .02 |
