# Supplementary material for: Racialized bias in pediatric pain: the role of observers’ attentional processing and estimations of children’s pain
Source: PeerJ journal article supplement (doi:10.7717/peerj.19969), 2025-08-29
Supplement: Appendix_S12.docx [file Appendix_S12.docx]

Supplementary figure 9: Diagnostic Plots for the LMM on the Raw Reaction Times
