# Supplementary material for: Racialized bias in pediatric pain: the role of observers’ attentional processing and estimations of children’s pain
Source: PeerJ journal article supplement (doi:10.7717/peerj.19969), 2025-08-29
Supplement: Appendix_S14.docx [file Appendix_S14.docx]

Supplementary figure 11: Diagnostic Plots for the LMM on the Box-Cox Transformed Reaction Times
